1 **Parental feeding preferences rather than sibling competition determine the death**  
2 **of smaller nestlings in asynchronous broods**

3

4 Manuel Soler<sup>\*†1</sup>, Francisco Ruiz-Raya<sup>†1,2</sup>, Lucía Sánchez-Pérez<sup>1</sup> and Juan Diego  
5 Ibáñez-Álamo<sup>1</sup>

6

7

8 <sup>1</sup> *Departamento de Zoología, Facultad de Ciencias, Universidad de Granada, E-18071*  
9 *Granada, Spain.*

10 <sup>2</sup> *Present address: Departamento de Ecología y Biología Animal, Universidad de Vigo,*  
11 *36310 Vigo, Spain*

12

13

14 \* Corresponding author

15 † Shared co-first authorship

16

17 **Abstract**

18 Hatching asynchrony is a reproductive tactic that, through the creation of competitive  
19 hierarchies among offspring, allows parents for a quick adjustment of brood size via the  
20 death of smaller nestlings. This strategy is considered to be adaptive in case of  
21 unpredictable and/or poor environments in which it would guarantee that at least larger  
22 nestlings will fledge. Brood reduction is the usual outcome in asynchronously hatched  
23 broods since first-hatched nestlings are larger and get a disproportionately larger share of  
24 the food delivered by parents, often leading the youngest nestling to starve to death soon  
25 after hatching. However, we still do not know the proximate mechanisms of such brood  
26 reduction. One possibility is that the smallest nestling is not fed because larger nestlings  
27 outcompete it, which implies that nestlings control resource allocation. Alternatively,  
28 parents might actively ignore the persistent begging from their smallest nestling, which  
29 would involve that parents control food allocation. To determine whether parents or  
30 nestlings ultimately induce brood reduction in this situation, we experimentally created  
31 asynchronous broods of Eurasian blackbird (*Turdus merula*) nestlings and quantified food  
32 allocation by parents in two different situations: when sibling competition was allowed  
33 and, alternatively, when competition was prevented by physically separating nestlings  
34 within the nests by using wooden barriers. Our results showed that experimentally  
35 introduced smaller nestlings received less food than their larger nestmates both when  
36 competition among nestlings was allowed and when it was prevented. When adult males  
37 and females are considered separately, males fed the smallest nestling less often  
38 regardless of whether sibling competition was allowed or not, but adult females showed  
39 no differences. We can conclude that the smallest nestling starves mainly because parents  
40 actively ignore its begging. The higher competitive ability of the larger nestlings seem to  
41 have little effect given that although the smallest nestling is fed at a higher rate when

42 physical interactions are prevented by the wooden barrier than when not, this difference  
43 is not significant. These findings suggest that parents rather than nestlings have the main  
44 control over food allocation.

45

46 **Key words:** Brood reduction, food allocation, sex differences in food allocation, hatching  
47 asynchrony, scramble competition, *Turdus merula*.

## 48 **Introduction**

49 In birds, the apparently most effective way to maximize parental fitness is to ensure that  
50 all laid eggs eventually result in fledglings. This is indeed what happens in most species:  
51 parents start incubation after clutch completion producing a brood of synchronously  
52 hatched nestlings of similar size. This strategy avoids the existence of competitive  
53 hierarchies among offspring and favours an equalitarian allocation of food among  
54 nestlings. Consequently, parents increase the chances that all nestlings will survive to  
55 fledge by preferentially feeding the hungriest nestling according to signal of need models  
56 (Davis et al. 1999; Soler 2001; Jeon 2008; Caro et al. 2008). Based on available  
57 information, it is often assumed that both hatching synchrony and food allocation  
58 favouring nestlings in worse condition (i.e. those begging at higher intensity) provide  
59 adaptive benefits in predictable and good environments since, when food is abundant, a  
60 high provisioning rate would allow parents to provide more food to the undernourished  
61 nestling and all offspring will be able to fledge (Lack 1947, 1954; Magrath 1990; Davis  
62 et al. 1999; Jeon 2008; Caro et al. 2016). In contrast, a synchronous brood could  
63 compromise nestling survival in unpredictable and/or poor environments since feeding  
64 all nestlings when food is scarce could provoke starvation in all or most of them. Thus,  
65 when food is scarce, any tactic allowing parents to adjust brood size according to food  
66 availability would be adaptive because this would guarantee that at least larger nestlings  
67 will fledge (Lack 1954; Jeon 2008; Caro et al. 2016). Hatching asynchrony is considered  
68 one of such tactics since, in unpredictable and/or poor environments, a size hierarchy  
69 among offspring would allow for a quick adaptive adjustment of brood size through death  
70 of smaller nestlings (the brood reduction hypothesis (Lack 1945, 1954)).

71 Brood reduction is the usual outcome in asynchronously hatched broods, in which  
72 first-hatched nestlings are larger and exhibit a higher competitive ability that allow them

73 to outcompete later-hatched (smaller) nestlings by getting a disproportionately larger  
74 share of the food delivered by parents (Lack 1954; Soler 2001; Jeon 2008). As a  
75 consequence, the youngest nestling often starves soon after hatching. This is supported  
76 by the fact that a bigger size increases the ability of a nestling to jostle for the best position  
77 in the nest, which is considered crucial to successfully compete for food (McRae et al.  
78 1993; Malacarne et al. 1994; Kilner 1995; Ostreiher 2001). Preferential feeding of larger  
79 nestlings has usually been interpreted as the outcome of scramble competition among  
80 offspring, assuming that nestlings exert full control over resource allocation by parents  
81 (scramble competition models (Macnair and Parker 1979; Mock and Parker 1997; Parker  
82 et al. 2002)). However, empirical and experimental evidence has shown that larger  
83 nestlings obtain more food than smaller nestlings even when showing a lower begging  
84 behaviour (Smiseth and Amundsen 2002; Mock et al 2011), which indicates that parents  
85 may have at least partial control in food allocation within asynchronous broods (Krebs et  
86 al 1999; Smiseth et al 2003). Despite this evidence, to what extent parents and nestlings  
87 exert control of brood reduction still remains unclear (McRae et al. 1993; Mock et al.  
88 2009). Recent studies suggest that parental control is much more relevant than nestling  
89 behaviour. For example, house wrens (*Troglodytes aedon*) are able to switch from  
90 synchronous hatching with all nestlings surviving to fledge in favourable conditions, to  
91 asynchronous hatching with brood reduction in less favourable conditions, even within  
92 the same breeding season (Ellis et al 2001). In Eurasian hoopoes (*Upupa epops*), it has  
93 been reported that while males feed larger nestlings placed in the best position (entrance  
94 of the nest), females usually enter the nest cavity and feed preferentially the smallest  
95 nestlings (Ryser et al. 2016). This seems to be the case in many asynchronously hatching  
96 species, in which females (and not males) feed the smallest nestling of the brood showing  
97 that females have control over food distribution (Gottlander 1987; Stamps et al. 1987;

98 Lifjeld et al. 1992; Leonard and Horn 1996; Slagsvold 1997a, 1997b; Krebs et al. 1999;  
99 Ploger and Madeiros 2004; Dickens and Hartley 2007; Budden and Beissinger 2009;  
100 Lahaye et al. 2015; Ryser et al. 2016). The frequently reported fact that females (and not  
101 males) feed the smallest nestling in the brood has inspired the “Male manipulation  
102 hypothesis”, which states that females, by provoking hatching asynchrony and keeping  
103 alive the smallest nestling (runt), which begs more and at a higher intensity, force males  
104 to work harder, carrying more food to the nest in asynchronously hatched broods (Soler  
105 et al. In prep.).

106         The fact that males and females differ in their food allocation rules in  
107 asynchronously-hatched broods implies that at least one of the sexes (males that are  
108 feeding selectively the best competitors, or females that are feeding selectively smaller  
109 nestlings) allocates food ignoring nestling begging behaviour, thus exerting the main  
110 control over food allocation. The crucial point in this situation is the undernourished  
111 smallest nestling who, after becoming a runt (i.e. a nestling with a retarded growth that  
112 does not have any probability of survival), starve to death. There are three possibilities to  
113 explain why one or more smaller nestlings in asynchronous broods starve: (a) runts are  
114 not fed because of sibling competition (i.e. larger nestlings outcompete them), (b) parents  
115 actively ignore the persistent begging from their smaller nestling, or (c) a mix of both. As  
116 far as we know, no study has assessed the relative importance of these three possibilities  
117 in the context of brood reduction. In this experimental study, we aim to determine to what  
118 extend either sibling competition or parental preferences are the responsible of runt’s  
119 starvation. Since previous studies have shown that males and females can follow different  
120 rules when allocating food among offspring (see references above), we considered the  
121 role of both sexes separately. To fulfill these objectives, we experimentally created  
122 asynchronous nests to explore parental food allocation patterns in two different situations:

123 (i) allowing physical interactions among nestlings and (ii) impeding them by using a  
124 wooden barrier that forces each nestling to stay in its portion of the nest.

125 Our main hypothesis, considering the increasing evidence that control by parents  
126 in food allocation is more relevant than previously thought (see references above), is that  
127 parents actively discriminate against runt nestlings regardless of nestling competition and  
128 nestling need (Hypothesis 1). This hypothesis predicts that the smallest nestling will  
129 receive less food than its nestmates not only when physical interactions are allowed, but  
130 also when the presence of a wooden barrier would impede those interactions. The other  
131 two non-mutually-exclusive alternative hypotheses are: food allocation by parents is  
132 determined by scramble competition among nestlings (Hypothesis 2). This hypothesis  
133 predicts that in natural conditions, when physical interactions occurs, the smallest nestling  
134 will receive less food than its nestmates, but when the presence of a wooden barrier would  
135 impede larger nestlings blocking their smaller nestlings, the neediest nestling, should be  
136 fed preferentially, or at least at the same frequency as its larger nestmates. Finally, the  
137 intermediate possibility is that both adults and offspring exert some control over food  
138 allocation by parents (Hypothesis 3). This hypothesis predicts that the smallest nestling  
139 should be fed at a significantly higher rate when physical interactions are prevented by  
140 the wooden barrier than when not.

141

## 142 **Methods**

### 143 *Study area and species*

144 Fieldwork was carried out in the Valley of Lecrín (Southern Spain; 36° 56' N, 3° 33' W;  
145 580 m a.s.l.) between mid-March and June in 2013 and 2015. As model species, we used  
146 the Eurasian blackbird (*Turdus merula*, hereafter blackbird), a medium sized passerine  
147 with a clear sexual dimorphism (adult males being black with a distinctive yellow-orange

148 beak and eye-ring, while adult females are dull dark, with lighter brown streaks on their  
149 breast), which makes it easy to recognize the sex involved in each feeding event. In our  
150 study area blackbirds' clutch size ranges from 2 to 5 eggs (Pers. Observ.). We have chosen  
151 this species because females start incubation before the last egg is laid inducing moderate  
152 hatching asynchrony (the last egg hatches latter than the rest and in some cases brood  
153 reduction occurs, mainly at the end of the breeding season and in other situations of poor  
154 environmental conditions (Cramp 1985)).

### 155 **General field procedures and experimental design**

156 We actively searched for blackbird nests in the study area throughout the breeding season.  
157 Once located, nests were visited every two days and, close to hatching, daily in order to  
158 detect newly-hatched chicks. In this species, hatching order can easily be assessed by a  
159 daily nest checking; even so, in those cases in which two nestlings hatched within 24  
160 hours, we relied on the chick's weight to establish the nestling rank. Recently-hatched  
161 nestlings were marked on their tarsus by using coloured permanent markers (Lumocolor)  
162 and, on days 6-7 post-hatching, with numbered rings for individual recognition.

163 We experimentally created four-nestlings asynchronous broods by conducting a cross-  
164 fostering manipulation in nests with similar hatching dates. On the experimental day 0, a  
165 one-day old nestling from a donor nest (experimental nestling; mean weight =  $7.4 \pm 0.3$   
166 g, n = 14) was introduced into a recipient nest containing three-days old nestlings ( $\pm 1$   
167 day, siblings' mean weight =  $14.5 \pm 0.3$  g, n = 42). The next day (experimental day 1;  
168 9:00 – 13:00 h), parental feeding activity was video recorded in two consecutive and non-  
169 overlapping trials, each trial lasting 1.5 hours. In one of these trials, siblings were allowed  
170 to physically compete for food while, in the other trial, physical interaction among  
171 nestlings was prevented by placing a wooden cross-shaped barrier into the cup nest  
172 (attached to the base of the nest by a twine thread) so that siblings remained separated in



173 four same-size compartments. Barriers were placed 30 minutes before the start of the  
174 recordings so that parents could get used to their presence in the nest. Nestlings were  
175 randomly placed into the nest compartments, being able to raise their heads above barriers  
176 during begging. In all cases, parents could easily feed all nestlings from the edge of the  
177 nest. The experimental trial in which nestlings remained separated by the wooden barrier  
178 was alternated in successive nests (first trial or second trial) to clearly separate the effect  
179 of the barrier presence from the potential order effect. We avoided altering the nest  
180 structure (i.e. relative position of nestlings in the nest) in successive trials. Although  
181 previous studies have suggested that the position of a nestling in the nest relative to its  
182 nestmates and the feeding parent may influence food obtained by the nestling (McRae et  
183 al. 1993; Malacarne et al. 1994; Kilner 1995; Ostreiher 2001), we assume that positional  
184 effects are irrelevant in our study because of two reasons. First, barriers and nestlings  
185 were placed randomly with regards to the position of the parent, and second, our barrier  
186 separating the nest cup in four parts removes the central position, which may be the most  
187 favourable.

188         About 30 minutes before the first trial, a video camera (Panasonic HDC-SD40)  
189 was placed near the nest (3 - 5 m) to determine parental feeding decisions and quantify  
190 food delivery rates to the first-hatched nestling (a-nestling), the second-hatched nestling  
191 (b-nestling), the third-hatched nestling (c-nestling) and the smallest (experimental)  
192 nestling. The video camera was attached to a small tripod and hidden in the vegetation  
193 near the nest, often at a higher height than the nest so that the filming was made from  
194 above in most cases (angles between 15° - 45°). Food allocation patterns were investigated  
195 by assessing the overall food load received by each nestling in one hour. To do that, we  
196 quantified the number of food items delivered to each chick by parents. One food item is  
197 defined as a prey that represents a volume similar to the size of blackbirds' bill. Thus, the

198 size category of food items was estimated from recordings by comparing the volume of  
199 each food item relative to the bill volume of the parent within bins of 50% (e.g., 50%,  
200 100%, 150%, etc., of bill volume) (Hauber and Moskát 2008). Additionally, food items  
201 smaller than 50% of the bill volume were all quantified as 10% of bill volume as they  
202 were mostly small insects of similar size. Finally, the volumes (i.e. size categories) of all  
203 items delivered to a single nestling were summed to generate the variable “food load”. In  
204 order to distinguish different nestlings in recordings, we marked their bill with individual  
205 colours by using permanent markers.

### 206 *Statistical analysis*

207 To assess the effects of our experimental manipulation on parents’ food allocation  
208 patterns, we fitted linear mixed models (LMM) by using the *nlme* package (Pinheiro et  
209 al. 2014), with the number of food items that nestlings received per hour (log-  
210 transformed) as a dependent variable. As fixed factors, our models included barrier  
211 presence (yes/no), nestling rank (a/b/c/experimental) and the interaction between these  
212 two terms, while chick identity nested within nest identity was included as random terms.  
213 Only significant interactions were retained in the models (Engqvist 2005). Post hoc  
214 contrasts were performed using the *lsmeans* package (Lenth 2016). The proportion of  
215 variance explained ( $R^2$ ) for our mixed models was calculated according to Nakagawa and  
216 Schielzeth (2013) and Nakagawa et al. (2017). In short, two values of  $R^2$  were calculated:  
217 the marginal r-squared ( $R^2_{LMM(m)}$ ), describing the proportion of variance explained by  
218 fixed factors alone, and the conditional r-squared ( $R^2_{LMM(c)}$ ), describing the proportion of  
219 variance explained by both fixed and random terms. Assumptions of normality and  
220 homogeneity of variances were verified through the visual inspection of residual graphs.  
221 All analyses and graphs were performed using R version 3.6.1 (R Core Team 2019).

222

## 223 **Results**

### 224 *Food allocation: general patterns*

225 The overall amount of food carried to the nest was similar when nestlings were separated  
226 by wooden barriers or when they were free to compete for resources ( $F_{1,52} = 0.24$ ;  $p =$   
227  $0.62$ ; Fig. 1). Importantly, the food was unevenly distributed among nestlings ( $F_{3,52} =$   
228  $9.58$ ;  $p < 0.0001$ ; Fig. 1), regardless of whether physical sibling competition was allowed  
229 or not, as indicated by the non-significant two-way interaction (LMM: nestling rank x  
230 barrier presence:  $F_{3,49} = 0.83$ ;  $p = 0.486$ ). These results are in agreement with the  
231 prediction derived from Hypothesis 1, while contradict that derived from Hypothesis 2.  
232 Overall, the younger experimental nestling received less food than the a-nestling, the b-  
233 nestling and the c-nestling (Table 1a; Fig. 1). Regarding to the prediction from Hypothesis  
234 3, although the smallest experimental nestling received more food items per hour ( $1.34 \pm$   
235  $0.26$ ;  $n = 14$ ) when separated by the wooden barrier than in natural conditions ( $0.80 \pm$   
236  $0.18$  food items per hour,  $n = 14$ ), this difference was not significant (estimate  $\pm$  se =  
237  $0.228 \pm 0.144$ ;  $df = 49$ ;  $t = 1.59$ ;  $p = 0.12$ ). Our statistical model explained 47.6% of total  
238 variance, in which the fixed part (i.e. the additive effects of sibling competition and  
239 parental preferences) explained 19.7% (Table 1a); however, whether sibling competition  
240 is excluded from models, the fixed part still explains 19.7% of variance, which seems to  
241 confirm that, while scramble competition among nestlings slightly (although not  
242 significantly) reduced the amount of food received by the smallest chick (Fig. 1), food  
243 allocation was mainly determined by parental decisions.

### 244 *Food allocation by males*

245 On average, male blackbirds visited their nests to feed nestlings  $4.01 \pm 0.39$  times per  
246 hour (range = 1.94 - 7.03,  $n = 14$ ). Males did not vary the overall amount of food provided  
247 to nestlings when they were separated and unable to compete compared with the control

248 situation ( $F_{1,52} = 0.80$ ;  $p = 0.38$ ). However, males differentially distributed food among  
249 siblings ( $F_{3,52} = 8.05$ ;  $p = 0.0002$ ), providing less food to the smallest nestling regardless  
250 the competitive context in which nestlings were maintained (LMM: nestling rank x barrier  
251 presence:  $F_{3,49} = 0.55$ ;  $p = 0.648$ ; Figure 2A). These results support the prediction derived  
252 from Hypothesis 1, while contradicts the prediction associated with Hypothesis 2. More  
253 specifically, the smallest (experimental) nestling received significantly less food than the  
254 a-nestling and the b-nestling, but there were no significant differences between the  
255 smallest and the c-nestling (Table 1b; Figure 2A). With respect to the prediction from  
256 Hypothesis 3, although the smallest nestling received more food items per hour when  
257 separated by the wooden barrier ( $0.86 \pm 0.21$ ;  $n = 14$ ) than in natural conditions ( $0.58 \pm$   
258  $0.12$  feeds per hour;  $n = 14$ ), this difference was not significant (estimate  $\pm$  se =  $0.112 \pm$   
259  $0.147$ ;  $df = 49$ ;  $t = 1.20$ ;  $p = 0.49$ ). Our statistical model for males explained 39.3% of  
260 total variance, in which the fixed part explained 17.1% (Table 1b); however, whether  
261 sibling competition is excluded from models, parental preferences still explain 16.8% of  
262 variance. Taken together these results indicate that, in the case of males, food allocation  
263 was mainly determined by parental decisions.

#### 264 *Food allocation by females*

265 Our results showed that female blackbirds visited their nests to feed nestlings  $2.27 \pm 0.29$   
266 times per hour (range =  $0.66 - 4.23$ ,  $n = 14$ ). The overall food load that nestlings received  
267 from females were not affected by the absence of physical sibling competition ( $F_{1,52} =$   
268  $0.81$ ;  $p = 0.37$ ). Females differentially fed nestlings ( $F_{3,52} = 3.40$ ;  $p = 0.02$ ), although such  
269 differences tended to soften when nestlings could not compete for food (LMM: nestling  
270 rank x barrier presence:  $F_{3,49} = 2.27$ ;  $p = 0.092$ ; Fig. 2B). Interestingly, post hoc tests  
271 revealed that, in the absence of physical competition (i.e. nestlings separated by barriers),  
272 the smallest experimental nestling was fed by females at similar rates than the other three

273 nestlings (all cases  $p > 0.22$ ). However, when nestlings were free to compete, the smallest  
274 nestling received less food than the b-nestling (estimate  $\pm$  se =  $-0.533 \pm 0.137$ ; df = 49; t  
275 =  $-3.884$ ;  $p = 0.0003$ ) and the c-nestling (estimate  $\pm$  se =  $-0.332 \pm 0.137$ ; df = 49; t = -  
276  $2.420$ ;  $p = 0.019$ ), and tended to receive less food than the a-nestling (estimate  $\pm$  se = -  
277  $0.240 \pm 0.137$ ; df = 49; t =  $-1.752$ ;  $p = 0.086$ ). Taken together, these results support the  
278 Hypothesis 2 stating that food allocation by females is mainly determined by nestling  
279 competition. However, the fact that the experimental smallest nestling did not receive  
280 significantly more food when scramble competition by larger nestlings was prevented  
281 seems to support the Hypothesis 1 too, advocating for a key role of parental decisions.  
282 Specifically, although the smallest experimental nestling received more food items per  
283 hour when separated by the wooden barrier ( $0.48 \pm 0.13$ ; n = 14) than in natural conditions  
284 ( $0.22 \pm 0.06$  food items per hour; n = 14), this difference was again not significant  
285 (estimate  $\pm$  se =  $0.154 \pm 0.128$ ; df = 49; t =  $1.20$ ;  $p = 0.24$ ). Our statistical model explained  
286 30.1% of total variance, in which the fixed part explained 8.5% (Table 1c). Nevertheless,  
287 when sibling competition is excluded from models, the fixed part (i.e. parental decisions)  
288 still explains 8.5% of variance.

### 289 *Survival of nestlings in asynchronous broods*

290 By day 6 post-hatching, a large proportion of experimental nestlings had starved in  
291 experimentally asynchronous broods (42.9%; N = 14). Furthermore, 50% of experimental  
292 nests were predated before fledgling, so eventually only one experimental nestling  
293 successfully fledged (7.1%).

## 294 **Discussion**

295 In species with asynchronously hatched broods, the smallest nestling obtains less food  
296 than their larger nestmates and frequently dies by starvation soon after hatching (Lack  
297 1945, 1954; Jeon 2008; Caro et al. 2016). Our results match these previous findings

298 indicating parental favoritism towards larger nestlings. In blackbirds, experimentally  
299 introduced smaller nestling received less food than their three larger nestmates (Fig. 1),  
300 which usually resulted in the death of the former by starvation. Regarding the main aim  
301 of our experimental study, we can state that larger nestlings are not preferentially fed by  
302 their parents because of their higher competitive abilities, given that differences in food  
303 allocation were maintained in the absence of sibling competition (Fig. 1). The  
304 experimental smallest nestling did not receive significantly more food from their parents  
305 in the absence of scramble competition than when physical interactions among nestlings  
306 were allowed (Fig. 1). Even though a small increase in the food received per hour by the  
307 smallest nestling occurs when nestlings are separated by the barrier (Fig. 1), it still  
308 receives less food from their parents compared to their larger nestmates. Taken together,  
309 our results do not support Hypotheses 2 and 3. However, we have found strong support  
310 for Hypothesis 1, which states that food allocation is mainly determined by parental  
311 decisions rather than sibling competition. These results imply that, at least in this  
312 passerine species with moderate brood reduction, parents have the main control over  
313 resources allocation. This could be also the case in other groups such as ardeids, in which  
314 brood reduction is much more frequent and larger nestlings even attack smaller ones  
315 without parental interference (Mock and Parker 1997). Ploger and Madeiros (2004), in an  
316 experiment performed using plastic barriers in the great egret (*Ardea alba*), found that  
317 while in natural conditions the largest nestling obtain more food than the other two  
318 nestlings in the brood, when nestlings were separated preventing physical interactions,  
319 the second nestling in the size hierarchy received more food than the first and the third  
320 nestlings. This means that also, in this species, parents may have some control. In our  
321 experimental design we have not controlled for nestling position in the nest cup with  
322 respect to the feeding parent. However, we are confident that positional effects are

323 irrelevant in our study because barriers and nestlings were placed randomly. Furthermore,  
324 several experimental studies in which the relative nestling position was controlled for  
325 have found that parents feed their nestlings regardless of their position in the nest (e.g.  
326 Kilner 1995, Tanner et al. 2008, Smith et al. 2017).

327         Interestingly, we found differences between sexes in food allocation. In our study,  
328 blackbird males provided significantly less food to the smallest nestling regardless the  
329 competitive context in which they were maintained (Fig 2a), which means that males do  
330 not simply feed the dominant nestling. When physical competition is prevented, males  
331 also preferentially feed larger nestlings. Importantly, this implies that nestlings have little  
332 or no control over food allocation regarding males' feeding events. On the other hand,  
333 females did not provide significantly less food to the smallest nestling in the barrier  
334 situation, but instead they evenly distributed the food among nestlings (Fig 2b). These  
335 results are similar to those found in the great egret. In their study, Ploger and Madeiros  
336 (2004) showed that when nestlings were prevented from aggressive interactions, females,  
337 but not males, did not feed preferentially the largest nestling, but the second in the size  
338 hierarchy. These results support the broadly confirmed fact that females feed smaller  
339 nestlings more than expected according to their size-hierarchy in the brood (see references  
340 above), thus exerting the main control over food allocation. These findings have also been  
341 found in other species. For instance, in the hoopoe, females, not only can feed  
342 preferentially the smallest nestling, usually placed in the worst position (Ryser et al.  
343 2016), but can also ignore begging calls from small nestlings while forcing to swallow  
344 food to a silent larger nestling (Martin-Vivaldi et al. 1999). Another fascinating example  
345 of parents having full control over food allocation occurs in magpie (*Pica pica*) nests,  
346 especially when parasitized by the great spotted cuckoo (*Clamator glandarius*).  
347 Sometimes, both in parasitized and non-parasitized nests, magpie parents, when no

348 nestling is begging, may induce one of them to beg by waking it up by touching it softly  
349 with the beak. But surprisingly, in parasitized nests, magpies may ignore cuckoos that  
350 beg for food (begging magpies are never ignored) and instead wake up one of their magpie  
351 nestlings (coax feedings (Soler et al. 2017)). In the presence of the wooden barriers, the  
352 amount of food provided to the smallest experimental nestling by males is lower  
353 compared to larger nestlings; in contrast, females fed the smallest nestling not  
354 significantly less than the other larger nestlings. This result is in agreement with the “Male  
355 manipulation hypothesis”, which predicts that females will provide some food to the  
356 smallest nestling to keep it alive to benefit of their intense begging forcing males to work  
357 harder (Soler et al. In prep).

358         In conclusion, our findings show that runts do not starve in asynchronous broods  
359 as a consequence of being outcompeted by their larger nestlings, but because both parents  
360 ignore their intense begging and prefer to feed one of the larger nestlings.

361

## 362 **Funding**

363 This work was supported by the Consejería de Economía, Innovación, Ciencia y Empleo,  
364 Junta de Andalucía (research project CVI-6653 to MS).

## 365 **Acknowledgements.**

366 We are indebted to D. W. Mock and E. Schlicht for their valuable comments on a previous  
367 version of this manuscript. We thank Teresa Abaurrea for her assistance with field work.

368 **Conflict of interest:** The authors have no conflict of interest to declare.

369 **Data accessibility.** All data that support the findings of this study will be available from  
370 the Digibug Digital Repository.



371 **References**

- 372 Budden AE, Beissinger SR. 2009. Resource allocation varies with parental sex and brood  
373 size in the asynchronously hatching green-rumped parrotlet (*Forpus passerinus*).  
374 Behav Ecol Sociobiol. 63:637–647.
- 375 Caro SM, Griffin AS, Hinde CA, West SA. 2016. Unpredictable environments lead to the  
376 evolution of parental neglect in birds. Nat Commun. 7, 10985.
- 377 Cramp S. (ed.) 1985. The Birds of the Western Palearctic. Vol. IV. Oxford: Oxford  
378 University Press.
- 379 Davis JN, Todd PM, Bullock S. 1999. Environment quality predicts parental provisioning  
380 decisions. Proc R Soc B 266: 1791–1797.
- 381 Ellis LA, Styrsky JD, Dobbs RC, Thompson CF. 2001. Female condition: a predictor of  
382 hatching synchrony in the house wren? Condor 103:587–591.
- 383 Engqvist L. 2005. The mistreatment of covariate interaction terms in linear model  
384 analyses of behavioural and evolutionary ecology studies. Anim. Behav. 70:4,  
385 967-971.
- 386 Gottlander K. 1987. Parental feeding behaviour and sibling competition in the pied  
387 flycatcher *Ficedula hypoleuca*. Ornis Scand. 18, 269-276.
- 388 Hauber ME, Moskát C. 2008. Shared parental care is costly for nestlings of common  
389 cuckoos and their great reed warbler hosts. Behav Ecol. 19:79–86.
- 390 Jeon J. 2008. Evolution of parental favoritism among different-aged offspring. Behav  
391 Ecol. 19:344–352.
- 392 Kilner RM. 1995. When do canary parents respond to nestling signals of need? Proc R  
393 Soc Lond B. 260:343–348.
- 394 Krebs EA, Cunningham RB, Donnelly CF. 1999. Complex patterns of food allocation in  
395 asynchronously hatching broods of crimson rosellas. Anim. Behav. 57:753-763.

- 396 Lack D. 1947. The significance of clutch size. *Ibis* 89:302-352.
- 397 Lack D. 1954. *The Natural Regulation of Animal Numbers*. Oxford: Clarendon Press.
- 398 Lahaye SEP, Eens M, Iserbyt A, Groothuis TGG, de Vries B, Muller W, Pinxten R. 2015.  
399 Influence of mate preference and laying order on maternal allocation in a  
400 monogamous parrot species with extreme hatching asynchrony. *Horm Behav.*  
401 71:49–59.
- 402 Lenth RV. 2016. Least-squares means: the R package lsmeans. *J Stat Softw.* 69:1–33.
- 403 Leonard M, Horn A. 1996. Provisioning rules in tree swallows. *Behav Ecol Sociobiol.*  
404 38:341–347.
- 405 Lifjeld JT, Breiehagen T, Lampe HM. 1992. Pied Flycatchers failed to use nestling size  
406 as a cue to favour own genetic offspring in a communally raised brood. *Ornis*  
407 *Scand.* 23:199-201.
- 408 Macnair MR, Parker GA. 1979. Models of parent-offspring conflict. III. Intra-brood  
409 conflict. *Anim Behav.* 26:111–122.
- 410 Magrath RD. 1990. Hatching asynchrony in altricial birds. *Biol Rev.* 65:587-622.
- 411 Malacarne G, Cucco M, Bertolo E. 1994. Sibling competition in asynchronously hatched  
412 broods of the pallid swift (*Apus pallidus*). *Ethol Ecol Evol.* 6:293-300.
- 413 Martin-Vivaldi M, Palomino JJ, Soler M, Soler JJ. 1999. Determinants of reproductive  
414 success in the Hoopoe *Upupa epops*, a hole-nesting non-passerine bird with  
415 asynchronous hatching. *Bird Study.* 46:205–216.
- 416 McRae SB, Weatherhead PJ, Montgomerie R. 1993. American robin nestlings compete  
417 by jockeying for position. *Behav Ecol Sociobiol.* 33:101-106.
- 418 Mock DW, Dugas MB, Strickler SA. 2011. Honest begging: expanding from signal of  
419 need. *Behav Ecol.* 22:909–917.

- 420 Mock DW, Parker GA. 1997. *The Evolution of Sibling Rivalry*. Oxford: Oxford Univ.  
421 Press.
- 422 Mock DW, Schwagmeyer PL, Dugas MB. 2009 Parental provisioning and nestling  
423 mortality in house sparrows. *Anim Behav.* 78:677-68.
- 424 Nakagawa S, Johnson PCD, Schielzeth H. 2017. The coefficient of determination  $R^2$  and  
425 intra-class correlation coefficient from generalized linear mixed-effects models  
426 revisited and expanded. *J R Soc Interface.* 14:20170213.
- 427 Nakagawa S, Schielzeth H. 2013. A general and simple method for obtaining  $R^2$  from  
428 generalized linear mixed-effects models. *Methods Ecol Evol.* 4:133–142.
- 429 Ostreiher R. 2001. The importance of nestling location for obtaining food in open cup-  
430 nests. *Behav Ecol Sociobiol.* 49:340-347.
- 431 Parker GA, Royle NJ, Hartley IR. 2002. Begging scrambles with unequal chicks:  
432 interactions between need and competitive ability. *Ecol Lett.* 5:206-215.
- 433 Pinheiro J, Bates D, Debroy S, Sarkar D. 2014. nlmle: Linear and nonlinear mixed effects  
434 models. R package version 3.1-117. Available: [http://CRAN.R-](http://CRAN.R-project.org/package=nlme)  
435 [project.org/package=nlme](http://CRAN.R-project.org/package=nlme)>.
- 436 Ploger BJ, Medeiros MJ. 2004. Unequal food distribution among great egret *Ardea alba*  
437 nestlings: parental choice or sibling aggression? *J Avian Biol.* 35:399-404.
- 438 R Core Team 2019. R: A language and environment for statistical computing. R  
439 Foundation for Statistical Computing, Vienna, Austria. URL [https://www.R-](https://www.R-project.org/)  
440 [project.org/](https://www.R-project.org/).
- 441 Ryser S, Guilloid N, Bottini C, Arlettaz R, Jacot A. 2016. Sex-specific food provisioning  
442 patterns by parents in the asynchronously hatching European hoopoe. *Anim.*  
443 *Behav.* 117:15–20.

- 444 Slagsvold T. 1997a. Brood division in birds in relation to offspring size: sibling rivalry  
445 and parental control. *Anim Behav.* 54:1357-1368.
- 446 Slagsvold T. 1997b. Is there a sexual conflict over hatching asynchrony in American  
447 robins? *Auk* 114:593-600.
- 448 Smiseth PT, Amundsen T. 2002. Senior and junior nestlings in asynchronous bluethroat  
449 broods differ in their effectiveness of begging. *Evol Ecol Res.* 4:1177-1189.
- 450 Smiseth PT, Bu RJ, Eikenaes AK, Amundsen, T. 2003. Food limitation in asynchronous  
451 bluethroat broods: effects on food distribution, nestling begging, and parental  
452 provisioning rules. *Behav Ecol.* 6:793-801.
- 453 Smith MG, Dickinson JL, Rush A, Wade AL, Yang DS. 2017. Western bluebird parents  
454 preferentially feed hungrier nestlings in a design that balances location in the nest.  
455 *Behav Ecol Sociobiol.* 71: 58.
- 456 Soler M, Macías-Sánchez E, Martín-Gálvez D, de Neve L. 2017. Complex feeding  
457 behaviour by magpies in nests with great spotted cuckoo nestlings. *J Avian Biol.*  
458 48:1406-1413.
- 459 Soler M. 2001. Begging behaviour of nestlings and food delivery by parents: the  
460 importance of breeding strategy. *Acta Ethol.* 4, 59–63.
- 461 Stamps J, Clark A, Arrowood P, Kus B. 1985. Parent-offspring conflict in budgerigars.  
462 *Behaviour* 94:1-40.
- 463 Stamps J, Clark A, Kus B, Arrowood P. 1987. The effects of parent and offspring gender  
464 on food allocation in budgerigars. *Behaviour.* 101:177-199.
- 465 Tanner M, Kölliker M, Richner H. 2008. Differential food allocation by male and female  
466 great tit, *Parus major*, parents: are parents or offspring in control? *Anim Behav.*  
467 75:1563–1569.
- 468
- 469

470 **Tables and figures**

471 **Table 1.** Summary of linear mixed models (LMM) fitted to assess the effect of nestling rank  
 472 and barrier presence on parental food allocation. Non-significant interactions were not retained  
 473 in the models. Table shows log-transformed estimates.

| <b>a) Food allocation: general patterns</b> | $\beta$ (se)    | t-value | p-value            |
|---------------------------------------------|-----------------|---------|--------------------|
| <i>Intercept</i>                            | 0.662 (0.072)   | 6.142   | 0.000              |
| c-nestling                                  | 0.335 (0.120)   | 2.801   | <b>0.007</b>       |
| b-nestling                                  | 0.638 (0.121)   | 5.284   | <b>&lt; 0.0001</b> |
| a-nestling                                  | 0.417 (0.121)   | 3.456   | <b>0.001</b>       |
| barrier presence (yes)                      | -0.036 (0.072)  | -0.494  | 0.620              |
| <i>Random effects</i>                       | <u>Variance</u> |         |                    |
| Nest ID                                     | 0.206           |         |                    |
| Chick ID <i>within</i> Nest ID              | 0.181           |         |                    |
| Residual                                    | 0.376           |         |                    |
| $R^2_{LMM(m)} = 0.197$                      |                 |         |                    |
| $R^2_{LMM(c)} = 0.476$                      |                 |         |                    |
| <b>b) Food allocation by males</b>          | $\beta$ (se)    | t-value | p-value            |
| <i>Intercept</i>                            | 0.511 (0.102)   | 5.030   | 0.000              |
| c-nestling                                  | 0.171 (0.115)   | 1.481   | 0.144              |
| b-nestling                                  | 0.520 (0.115)   | 4.520   | <b>&lt; 0.0001</b> |
| a-nestling                                  | 0.391 (0.115)   | 3.392   | <b>0.001</b>       |
| barrier presence (yes)                      | -0.067 (0.073)  | -0.920  | 0.362              |
| <i>Random effects</i>                       | <u>Variance</u> |         |                    |
| Nest ID                                     | 0.182           |         |                    |
| Chick ID <i>within</i> Nest ID              | 0.144           |         |                    |
| Residual                                    | 0.384           |         |                    |
| $R^2_{LMM(m)} = 0.171$                      |                 |         |                    |
| $R^2_{LMM(c)} = 0.393$                      |                 |         |                    |
| <b>c) Food allocation by females</b>        | $\beta$ (se)    | t-value | p-value            |
| <i>Intercept</i>                            | 0.229 (0.090)   | 2.552   | 0.014              |
| c-nestling                                  | 0.253 (0.104)   | 2.433   | <b>0.018</b>       |
| b-nestling                                  | 0.638 (0.104)   | 2.900   | <b>0.005</b>       |
| a-nestling                                  | 0.417 (0.104)   | 1.200   | 0.235              |
| barrier presence (yes)                      | 0.059 (0.066)   | 0.884   | 0.381              |
| <i>Random effects</i>                       | <u>Variance</u> |         |                    |
| Nest ID                                     | 0.148           |         |                    |
| Chick ID <i>within</i> Nest ID              | 0.126           |         |                    |
| Residual                                    | 0.349           |         |                    |
| $R^2_{LMM(m)} = 0.085$                      |                 |         |                    |
| $R^2_{LMM(c)} = 0.301$                      |                 |         |                    |

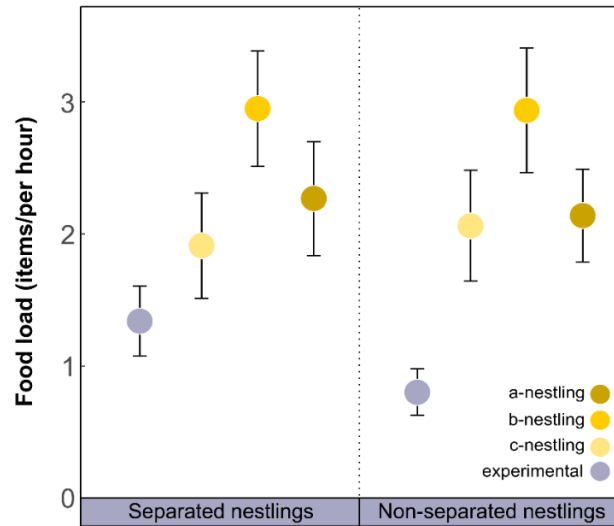

474

475 **Figure 1.** Parental food allocation among non-experimental siblings (n = 42;  
476 yellow palette) and the smaller experimental nestling (n = 14; grey). Values are  
477 presented as means  $\pm$  se.

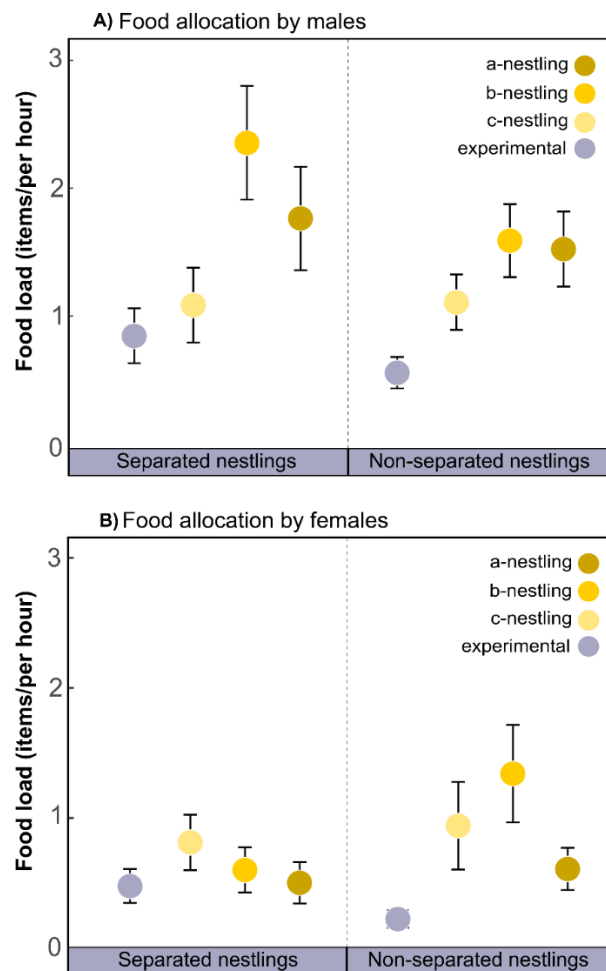

478

479 **Figure 2.** Food allocation among non-experimental siblings (n = 42; yellow palette) and  
480 the smaller experimental nestling (n = 42; grey) by male (A) and female blackbirds (B).  
481 Values are presented as means  $\pm$  se.
